# Supplementary material for: Early Effects of a Hypocaloric, Mediterranean Diet on Laboratory Parameters in Obese Individuals
Source: PubMed Central journal article supplement (PMC3960747; doi:10.1155/2014/750860), 2014-03-04
Supplement: 750860.f1.pdf [file 750860.f1.pdf]

**Supplementary Table.** Reference values of biochemical traits.

|                             | <b>Reference values</b> |
|-----------------------------|-------------------------|
| Total cholesterol (mg/dL)   | <200                    |
| HDL (mg/dL)                 | >35                     |
| Triglycerides (mg/dL)       | <150                    |
| Fasting Glucose (mg/dL)     | 70-110                  |
| Basal insulin ( $\mu$ U/mL) | 4-25                    |
| HOMA-IR                     | <2.5                    |
| $\gamma$ GT (U/L)           | 8-61                    |
| AST (U/L)                   | <38                     |
| ALT (U/L)                   | <41                     |
| LDH (U/L)                   | 240-480                 |
| Adiponectin ( $\mu$ g/mL)   | >10                     |
| Leptin (ng/mL)              | <40                     |
| Resistin (ng/mL)            | >4                      |
| Visfatin (ng/mL)            | >2                      |
| Cystatin C (mg/dL)          | 0.53-0.95               |
| PT (%)                      | 70-120                  |
| aPTT (sec)                  | 24-35                   |
| Fibrinogen (mg/dL)          | 200-400                 |
| PAI-1 (U/mL)                | 0.3-3.5                 |
| hsCRP (mg/dL)               | 1.69-2.87               |
| IL-2 (pg/mL)                | 0.0-15.2                |
| IL-4 (pg/mL)                | 0.0-20.3                |
| IL-6 (pg/mL)                | 0.0-5.6                 |
| IL-8 (pg/mL)                | 1.9-17.4                |
| IL-10 (pg/mL)               | 0.0-6.3                 |
| VEGF (pg/mL)                | 15.5-431.3              |
| IFN $\gamma$ (pg/mL)        | 0.0-13.6                |
| TNF $\alpha$ (pg/mL)        | 0.0-13.3                |
| IL-1 $\alpha$ (pg/mL)       | 0.0-2.8                 |
| IL-1 $\beta$ (pg/mL)        | 0.0-2.4                 |
| MCP-1 (pg/mL)               | 70.5-209.3              |
| EGF (pg/mL)                 | 6.7-170.2               |
